# Supplementary material for: Smooth muscle protein 22α-Cre recombination in resting cardiac fibroblasts and hematopoietic precursors
Source: PubMed Central journal article supplement (PMC9263136; doi:10.1038/s41598-022-15957-2), 2022-07-07

Supplementary Figure 1

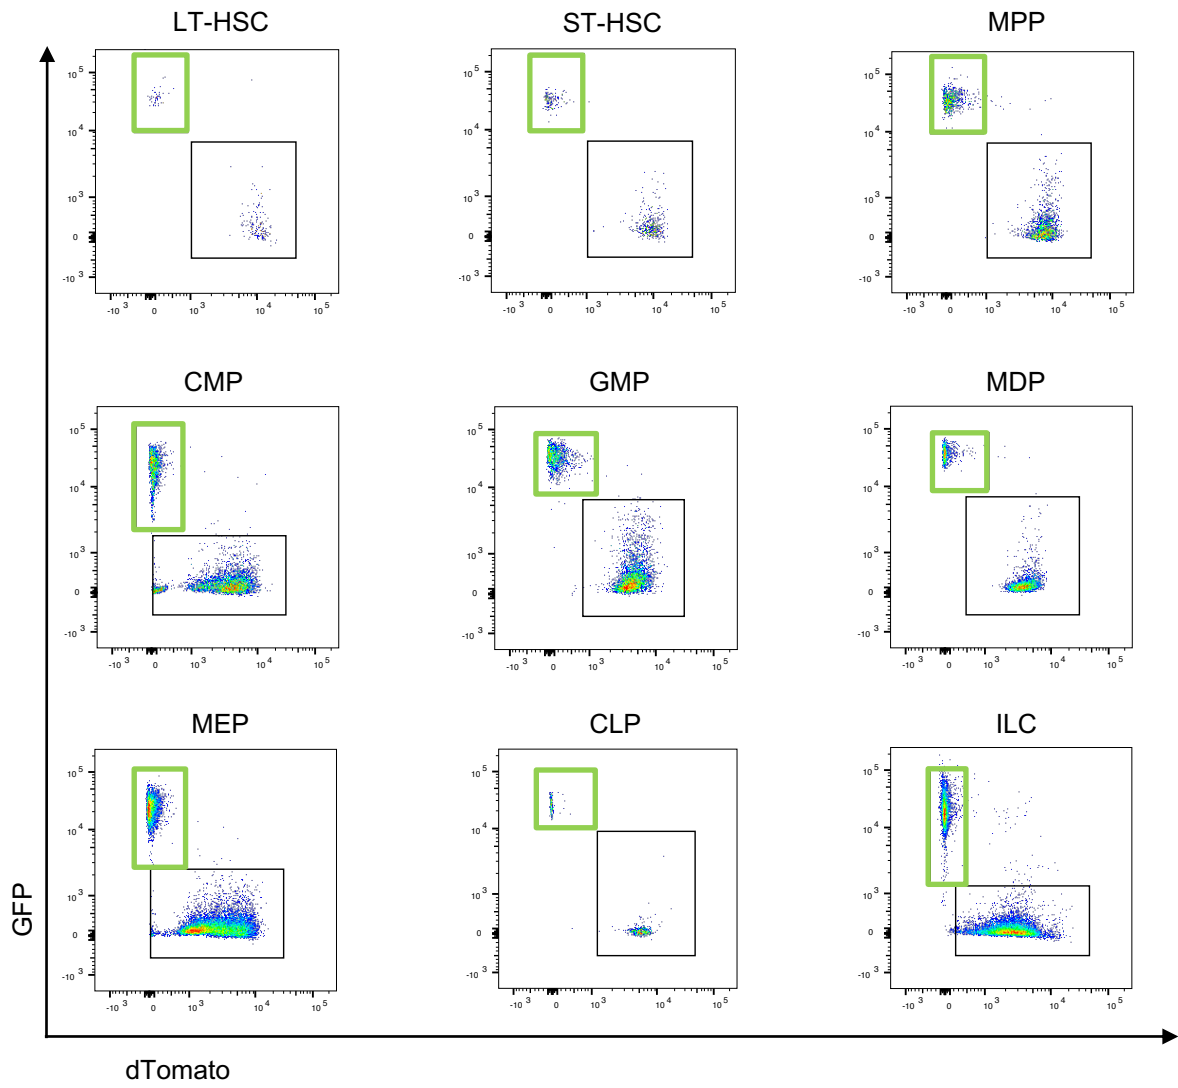

Supplementary Figure 2

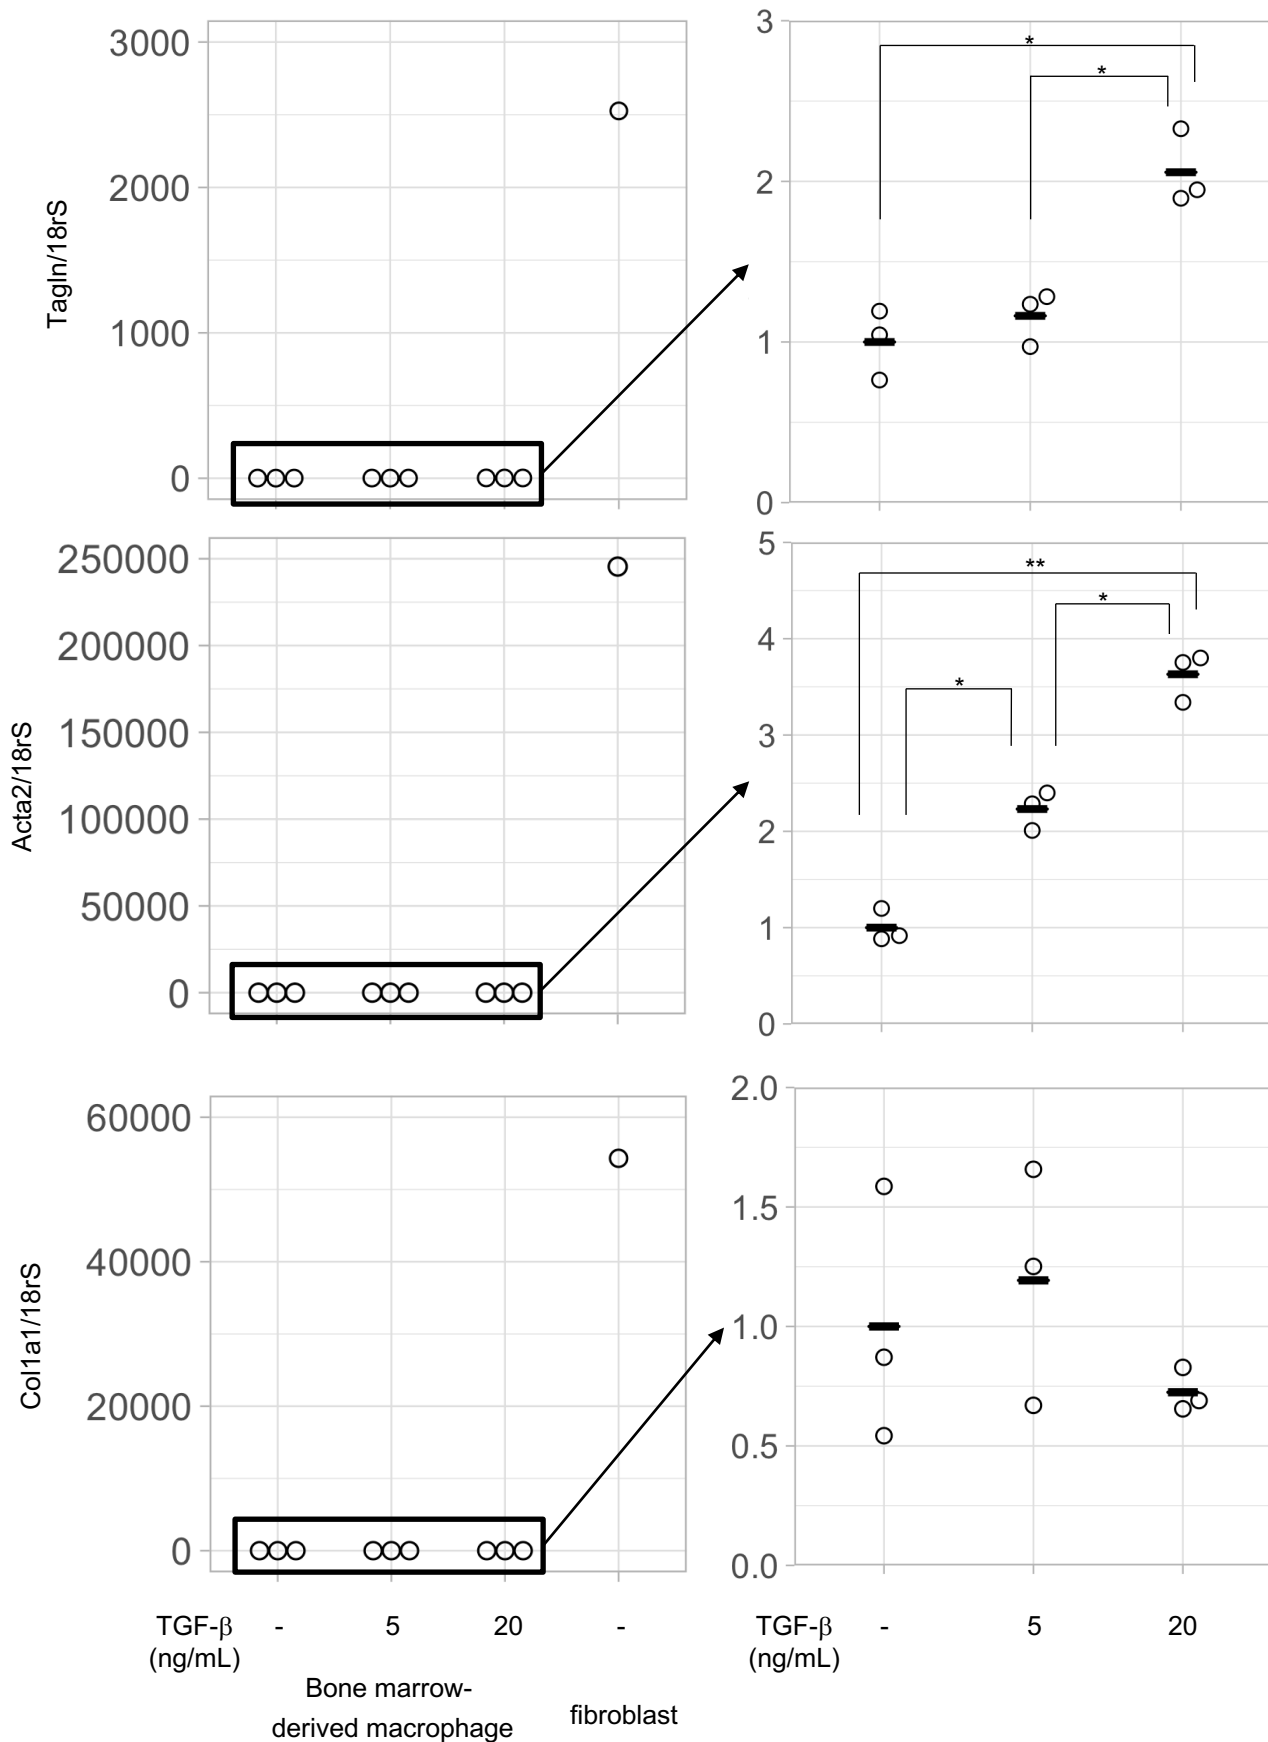

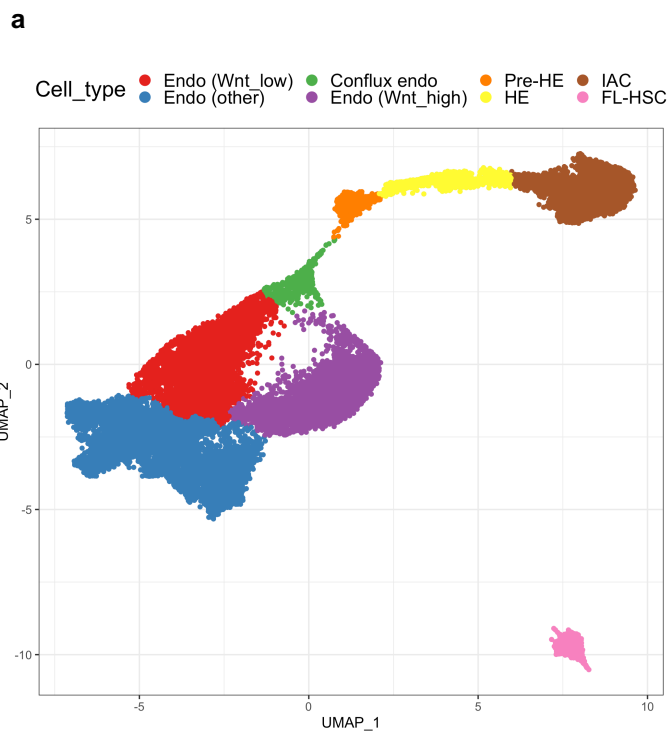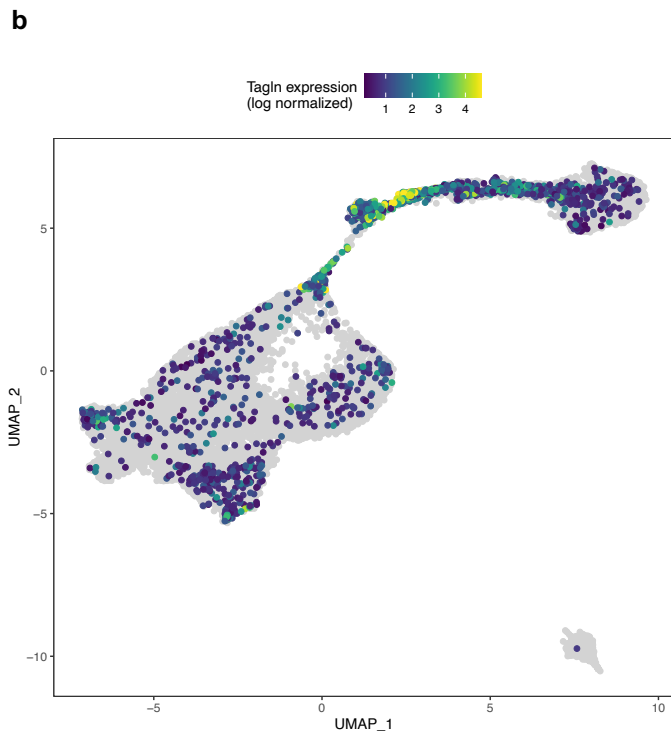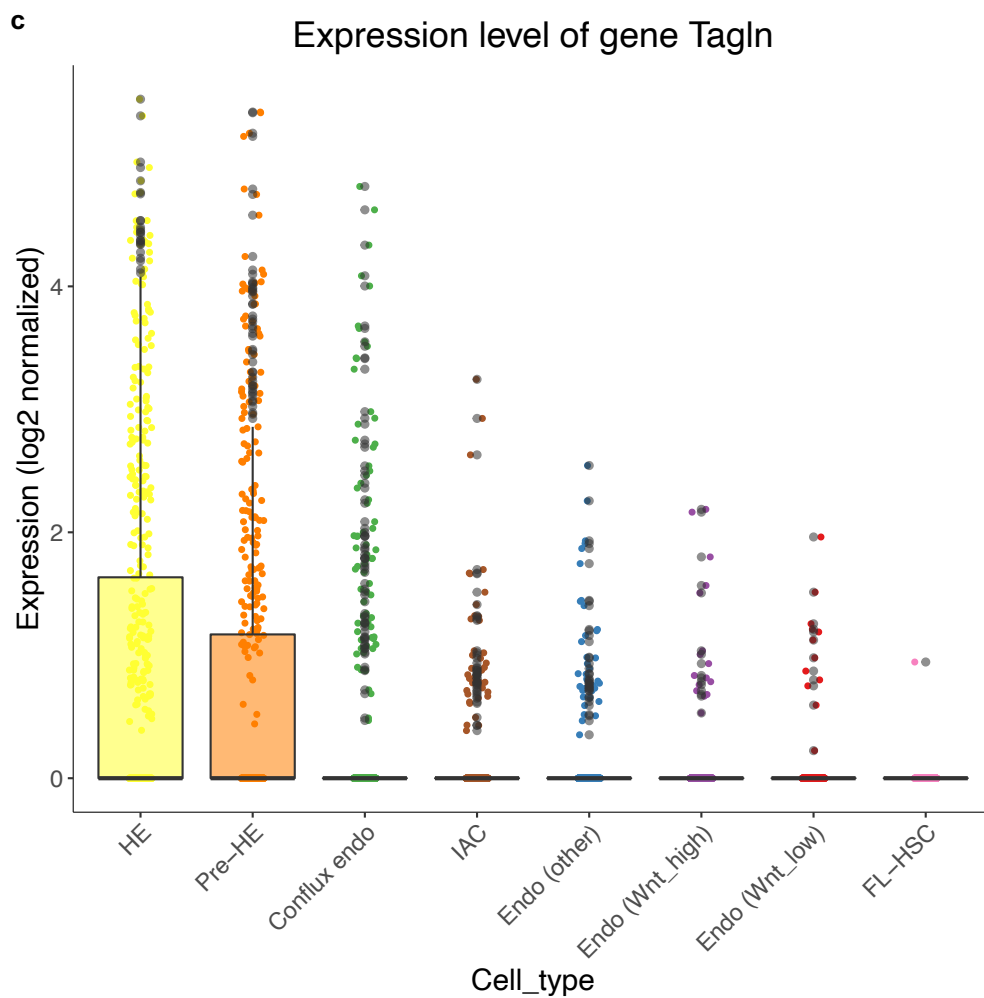

Supplement: 41598_2022_15957_MOESM1_ESM.pdf [file 41598_2022_15957_MOESM1_ESM.pdf]
